# Supplementary material for: Identification of attractive odorants released by preferred bacterial food found in the natural habitats of C. elegans
Source: PLoS One. 2018 Jul 23;13(7):e0201158. doi: 10.1371/journal.pone.0201158 (PMC6056031; doi:10.1371/journal.pone.0201158)
Supplement: S1 Table — (PDF) [file pone.0201158.s001.pdf]

**Supplemental Table 1. Retention times of identified volatile organic compounds (VOCs) in**

[illegible]
